# Supplementary material
Source: ML conference proceedings conference paper supplement (https://proceedings.neurips.cc/paper_files/paper/2021/hash/5fde40544cff0001484ecae2466ce96e-Abstract.html)
Supplement: Supplementary file 1 [file 5fde40544cff0001484ecae2466ce96e-Supplemental.zip]

Archive with 14 entries (12 files):
- supplementary/
- supplementary/code/
- supplementary/code/evaluate.py
- supplementary/code/latent_selection.py
- supplementary/code/models.py
- supplementary/code/quantizer_entropy.py
- supplementary/code/README.md
- supplementary/code/reduction_methods.txt
- supplementary/code/requirements.txt
- supplementary/code/run_with_params.py
- supplementary/code/train.py
- supplementary/code/utils.py
- supplementary/code_to_recreate_experiments.py
- supplementary/supplementary.pdf
