# Supplementary material
Source: ML conference proceedings conference paper supplement (https://proceedings.neurips.cc/paper_files/paper/2021/hash/5fde40544cff0001484ecae2466ce96e-Abstract.html)
Supplement: Supplementary file 1 [file 5fde40544cff0001484ecae2466ce96e-Supplemental.zip › supplementary/code/README.md]

Note: Don't pip install -r requirements.txt. Have to install torch from the official site:
https://stackoverflow.com/a/58817063/7706521
