# Supplementary material
Source: ML conference proceedings conference paper supplement (https://proceedings.neurips.cc/paper_files/paper/2021/hash/5fde40544cff0001484ecae2466ce96e-Abstract.html)
Supplement: Supplementary file 1 [file 5fde40544cff0001484ecae2466ce96e-Supplemental.zip › supplementary/code/requirements.txt]

cycler==0.10.0
kiwisolver==1.3.1
lmdb==1.2.1
matplotlib==3.2.0
numpy==1.20.2
opencv-python==4.5.1.48
Pillow==8.1.2
pyparsing==2.4.7
python-dateutil==2.8.1
scipy==1.6.0
six==1.16.0
torch==1.3.0+cu92
torchsummary==1.5.1
torchvision==0.4.1
